# Supplementary material
Source: PubMed Central journal article supplement (PMC6579509)
Supplement: bjsports-2016-097330supp002.pdf [file bjsports-2016-097330supp002.pdf]

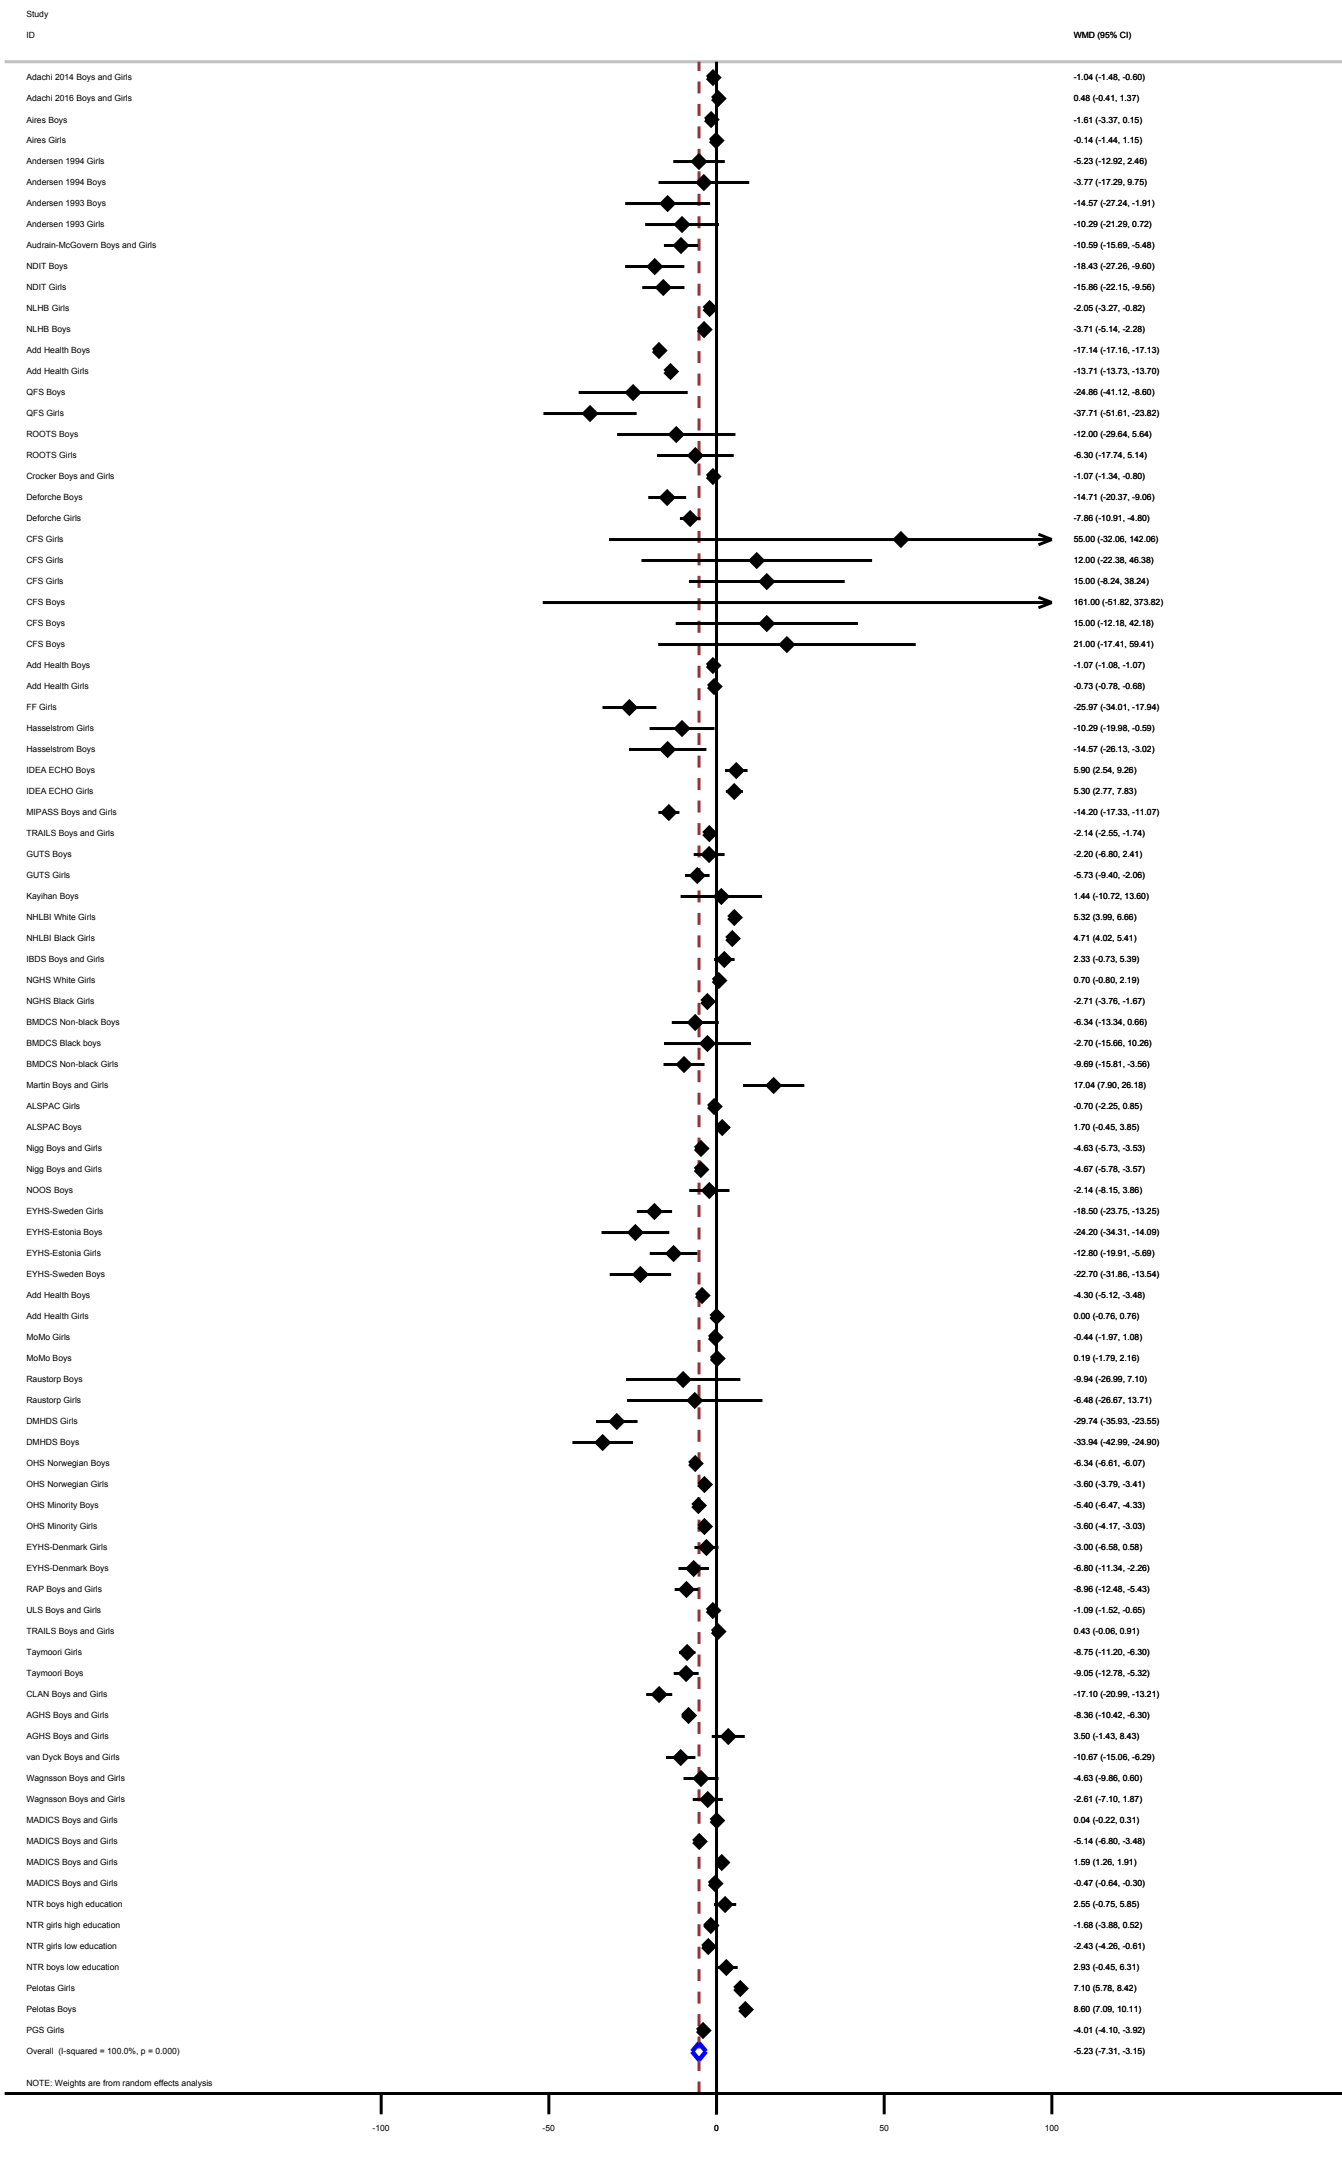

NOTE: Weights are from random effects analysis

-100

-50

0

50

100

MVPA/day (mins) lower as adult

MVPA/day (mins) higher as adult
